# Supplementary material for: Kinetics study of heterogeneous continuous-flow nitration of trifluoromethoxybenzene
Source: Royal Society of Chemistry journal article supplement (doi:10.1039/c7re00182g), 2018-01-01
Supplement: c7re00182g1.pdf [file c7re00182g1.pdf]

Supporting Information for

**Kinetics study of heterogeneously continuous-flow nitration of  
trifluoromethoxybenzene**

Zhenghui Wen<sup>a,b</sup>, Mei Yang<sup>a</sup>, Shuainan Zhao<sup>a,b</sup>, Feng Zhou<sup>a,b</sup> and Guangwen Chen<sup>a,\*</sup>

<sup>a</sup> Dalian National Laboratory for Clean Energy, Dalian Institute of Chemical Physics, Chinese Academy of Sciences, Dalian 116023, China

<sup>b</sup> University of Chinese Academy of Sciences, Beijing 100049, China

\* Corresponding author. Tel.: +86-411-8437-9031, Fax.: +86-411-8469-1570

E-mail: gwchen@dicp.ac.cn (G.W. Chen).

## Physical properties of TFMB and sulfuric acid solutions

Table S1 Physical properties of TFMB and sulfuric acid solutions

| substance               | Temperature | $\mu$ | $\rho$            |
|-------------------------|-------------|-------|-------------------|
|                         | K           | mPa·s | kg/m <sup>3</sup> |
| TFMB                    | 278         | 1.25  | 1226.3            |
|                         | 283         | 1.23  |                   |
|                         | 288         | 1.20  |                   |
|                         | 293         | 1.17  |                   |
| Sulfuric acid (84 wt %) | 278         | 35.1  | 1787.6            |
|                         | 283         | 28.9  | 1782.0            |
|                         | 288         | 24.5  | 1776.4            |
|                         | 293         | 20.5  | 1770.9            |
| Sulfuric acid (82 wt %) | 278         | 32.9  | 1769              |
|                         | 283         | 27.9  | 1762.9            |
|                         | 288         | 23.3  | 1758.6            |
|                         | 293         | 19.1  | 1753.2            |
| Sulfuric acid (80 wt %) | 278         | 29.6  | 1739.9            |
|                         | 283         | 25.3  | 1734.6            |
|                         | 288         | 21.7  | 1729.3            |
|                         | 293         | 18.3  | 1724.2            |
| Sulfuric acid (75 wt %) | 278         | 24.6  | 1687.3            |
|                         | 283         | 20.2  | 1682.4            |
|                         | 288         | 17.1  | 1677.4            |
|                         | 293         | 14.7  | 1672.6            |

TFMB: molecular weight=162.11 g/mol, boiling point=375 K.

Sulfuric acid: molecular weight=98.1 g/mol, boiling point=613 K.

## Schematic diagram of setup for flow pattern observational experiment

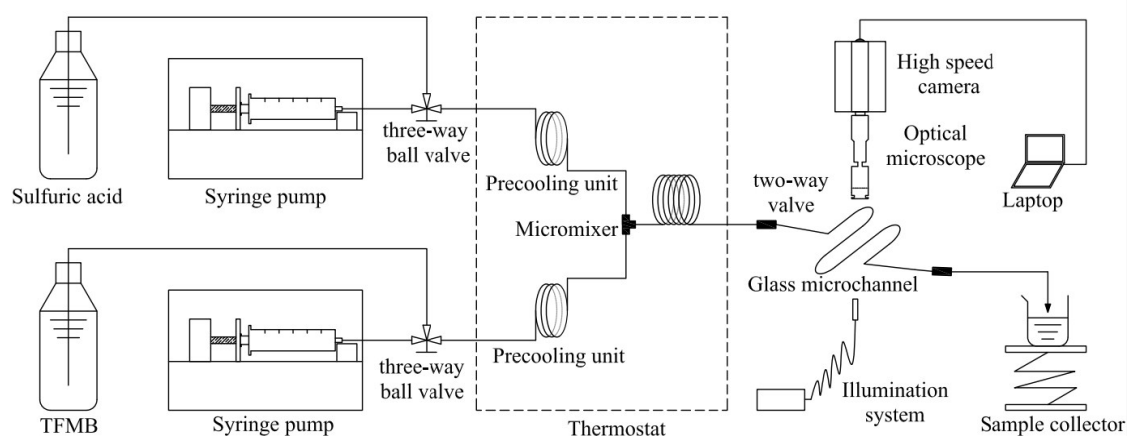

Figure S1 Schematic diagram of experimental setup for the flow pattern observation.

## GC spectrogram of compounds involved in reaction

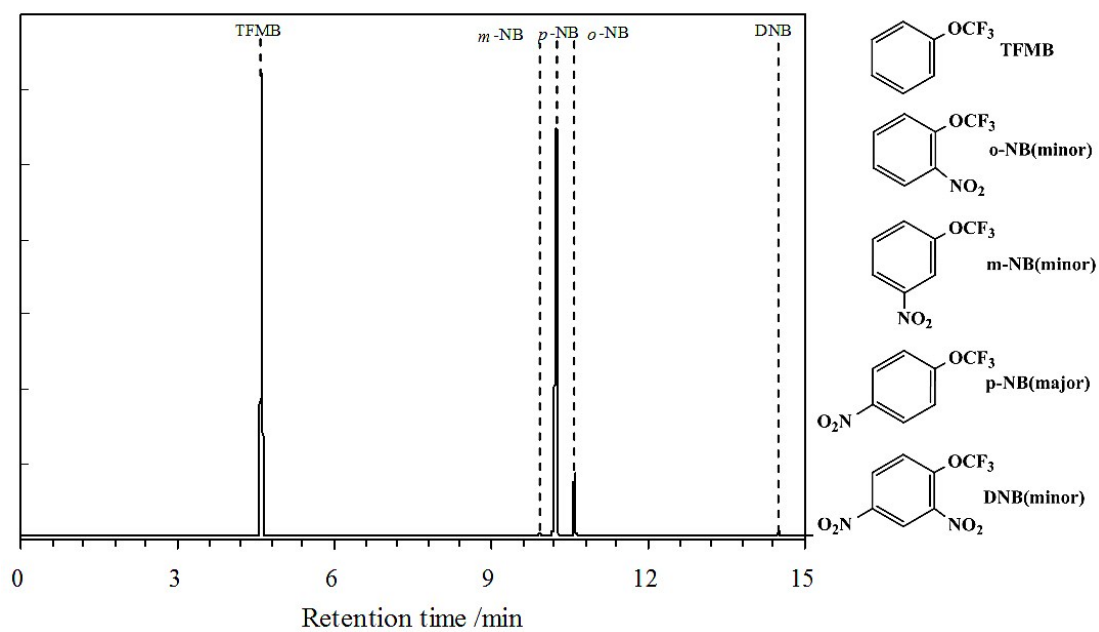

Figure S2 GC spectrogram of all compounds involved in the reaction.

## Mass spectrum of p-(trifluoromethoxy) benzene sulfonic acid

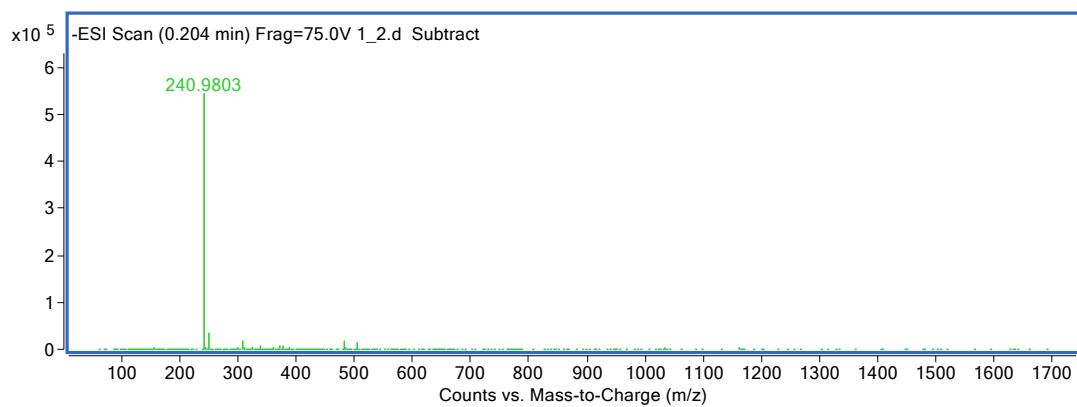

Figure S3 Mass spectrum of p-(trifluoromethoxy) benzene sulfonic acid.

## Comparison of observed second-order rate constant

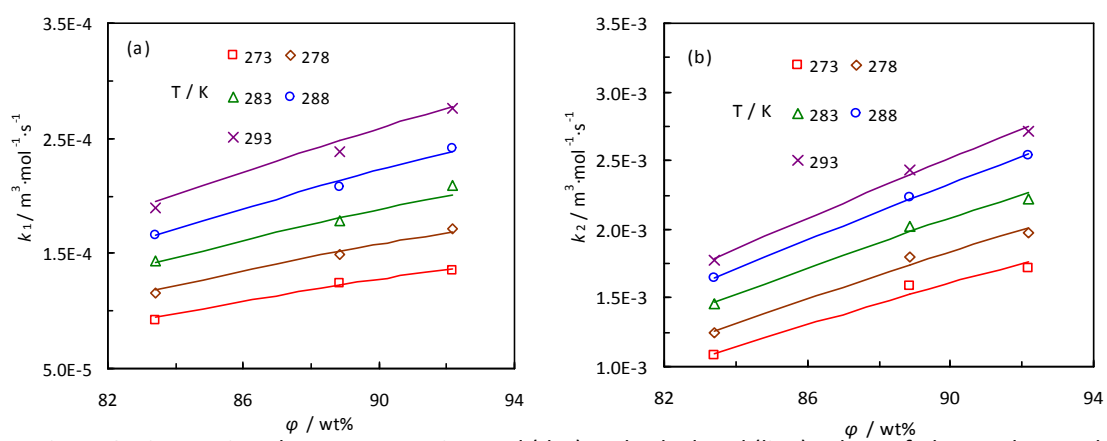

Figure S4 Comparison between experimental (dot) and calculated (line) values of observed second-order rate constant at different sulfuric acid strengths and temperatures (a) *o*-NB (b) *p*-NB.

### Flow chart of the kinetic study

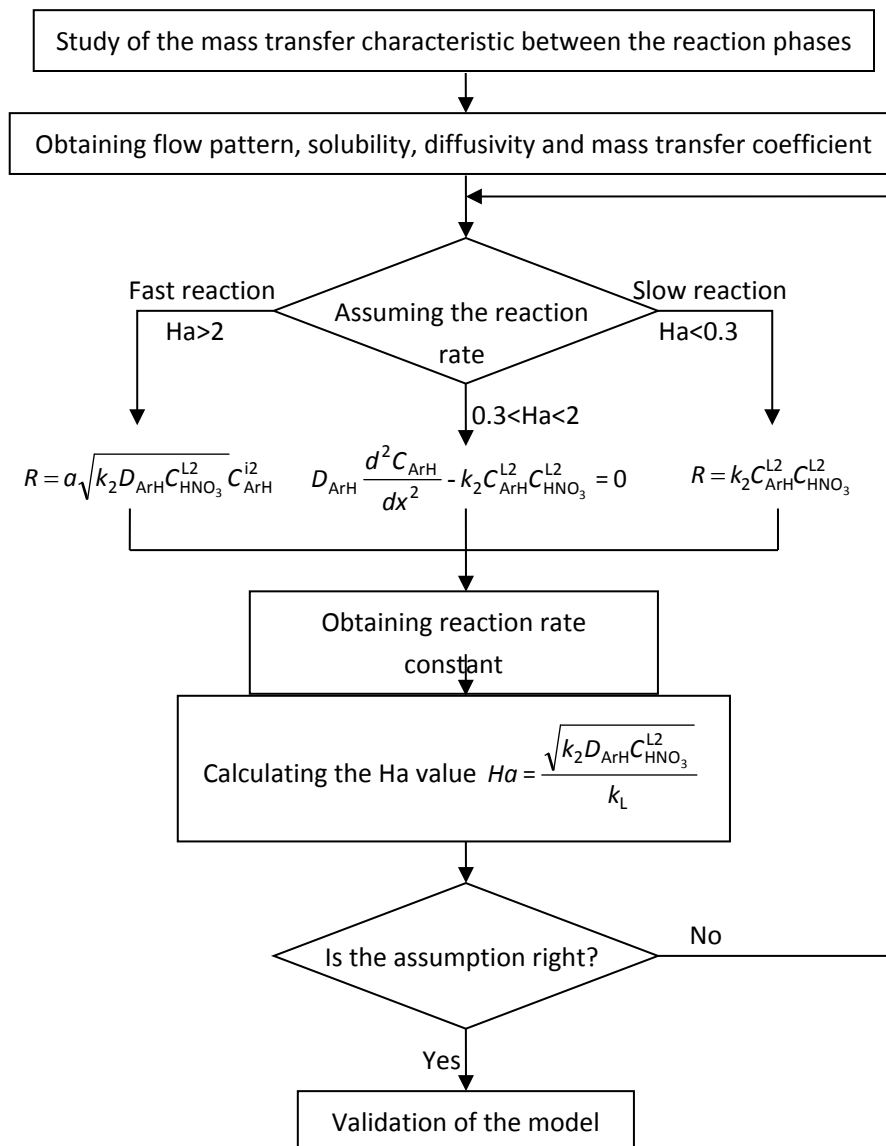

## MATLAB program used for solving Eq.6

```
function odes_fit
format long
clear all
clc

k0 = [0 0];           % Parameter initial value
lb = [0 0];           % Parameter lower limit
ub = [+inf +inf];     % Parameter upper limit

%Experimental data
% t          B          pNB          oNB
data=...
    [ 0          0          0          0
      5.03    0.110439016    0.100248547    0.009951361
      7.54    0.155662656    0.141088625    0.014227765
     10.06    0.195082447    0.177579731    0.017108608
     12.57    0.251992372    0.227500878    0.023543548
     15.09    0.280506122    0.253835865    0.02528611
    ];
x0=data(1,2:end);
tspan = [data(:,1)'];
yexp = [data(2:end,2) data(2:end,3) data(2:end,4)];

% Using the function lsqnonlin() to estimate the parameters
[k,resnorm,residual,exitflag,output,lambda,jacobian] = ...
    lsqnonlin(@ObjFunc,k0,lb,ub,[],tspan,x0,yexp);
ci = nlparci(k,residual,jacobian);
fprintf('\n\nUsing the function lsqnonlin() to estimate the parameter values as follows:\n')
fprintf('\tk1 = %.9f \n',k(1))
fprintf('\tk2 = %.9f \n',k(2))

figure(1)

ts=0:((max(tspan)-min(tspan))/100):max(tspan);
[ts ys] = ode45(@KineticsEqs,ts,x0,[],k);
yy = [data(:,2) data(:,3) data(:,4)];
figure(1)
plot(ts,ys(:,1),'b',tspan,yy(:,1),'bo');
figure(2)
plot(ts,ys(:,2),'r',tspan,yy(:,2),'ro');
figure(3)
plot(ts,ys(:,3),'g',tspan,yy(:,3),'go');
figure(4)
```

```

plot(ts,ys(:,1),'b',tspan,yy(:,1),'bo',ts,ys(:,2),'r',tspan,yy(:,2),'ro',ts,ys(:,3),'k',tspan,yy(:,3),'ko')
legend('Calculated value of C1','Experimental value of C1','Calculated value of C2','Experimental value
of C2','Calculated value of C3','Experimental value of C3','Location','best');

```

```

function f = ObjFunc(k,tspan,x0,yexp) % Objective function

```

```

[t Xsim] = ode45(@KineticsEqs,tspan,x0,[],k);

```

```

Xsim1=Xsim(:,1);

```

```

Xsim2=Xsim(:,2);

```

```

Xsim3=Xsim(:,3);

```

```

ysim(:,1) = Xsim1(2:end);

```

```

ysim(:,2) = Xsim2(2:end);

```

```

ysim(:,3) = Xsim3(2:end);

```

```

f = [(ysim(:,1)-yexp(:,1)) (ysim(:,2)-yexp(:,2)) (ysim(:,3)-yexp(:,3))];

```

```

function dCdt = KineticsEqs(t,C,k) % ODE model equation

```

```

C1=C(1);C2=C(2);C3=C(3);

```

```

k1=k(1);k2=k(2);

```

```

C0=8.4096;

```

```

% Saturate concentration of TFMB in sulfuric acid, mol/m3

```

```

M=0.8987;

```

```

% Ratio of initial molar of TFMB and nitric acid

```

```

dC1dt = (k(1)+k(2))*C0*(M-C(1));

```

```

dC2dt = k(1)*C0*(M-C(1));

```

```

dC3dt = k(2)*C0*(M-C(1));

```

```

dCdt = [dC1dt;dC2dt;dC3dt];

```
